# Supplementary material for: CuO/cryptomelane catalyst for preferential oxidation of CO in the presence of H2: deactivation and regeneration
Source: Royal Society of Chemistry journal article supplement (doi:10.1039/c6cy00329j), 2016-01-01
Supplement: c6cy00329j1.pdf [file c6cy00329j1.pdf]

1 **CuO/Cryptomelane catalyst for preferential oxidation of CO in**  
2 **the presence of H<sub>2</sub>: deactivation and regeneration.**

3

4

5 *A. Davó-Quñonero, M. Navlani-García, D. Lozano-Castelló, A. Bueno-López*

6 MCMA group. Inorganic Chemistry Department; University of Alicante

7

8

9

10

11

12

13

**SUPPLEMENTARY MATERIAL**

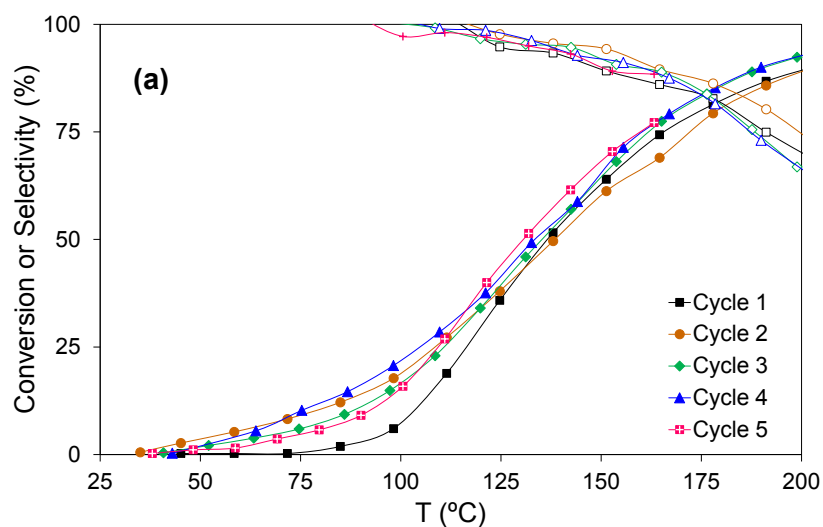

15

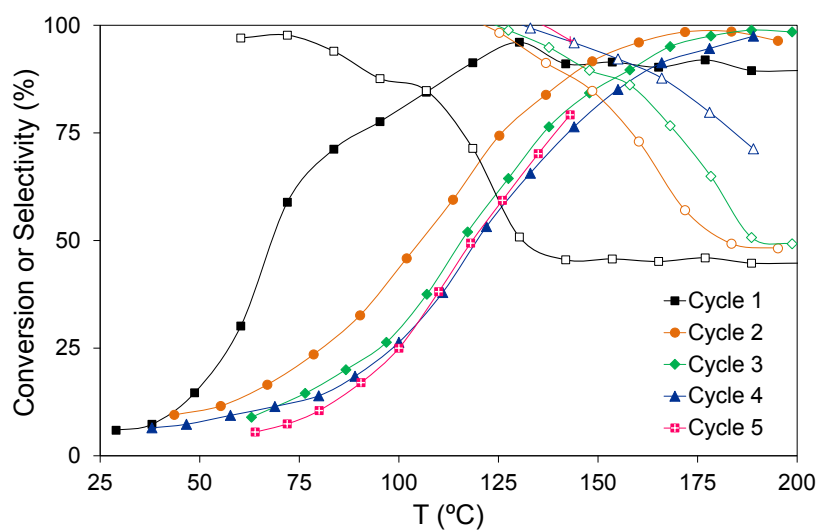

16

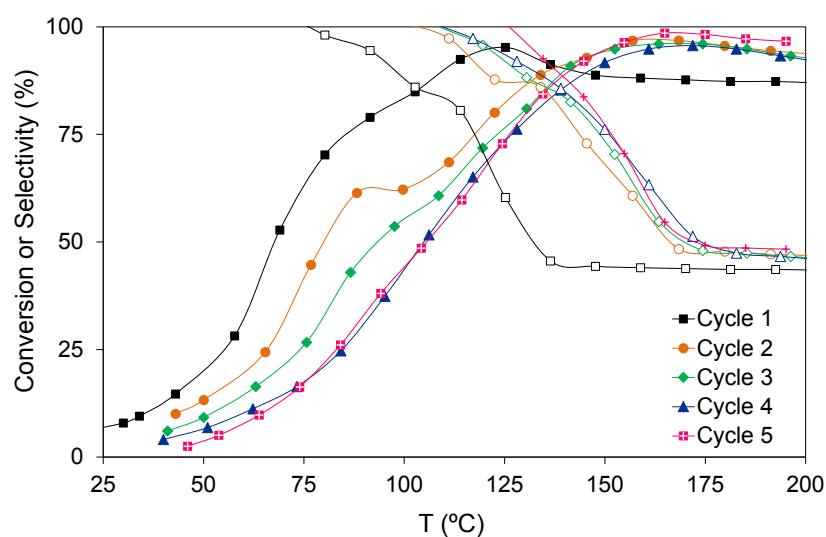

17

18 **Figure 1.** CO conversion (solid symbols) and CO selectivity (hollow symbols) obtained  
 19 in CO-PROX experiments performed with: (a) Cryptomelane reoxidized at 200°C after  
 20 each cycle, (b) CuO/Cryptomelane reoxidized at 200°C after each cycle and (c)  
 21 CuO/Cryptomelane reoxidized at 400°C after each cycle. Reaction conditions: 150 mg of  
 22 catalyst, 2% CO, 2% O<sub>2</sub>, 30 % H<sub>2</sub>, balance He, 100 mL/min. 2°C/min.

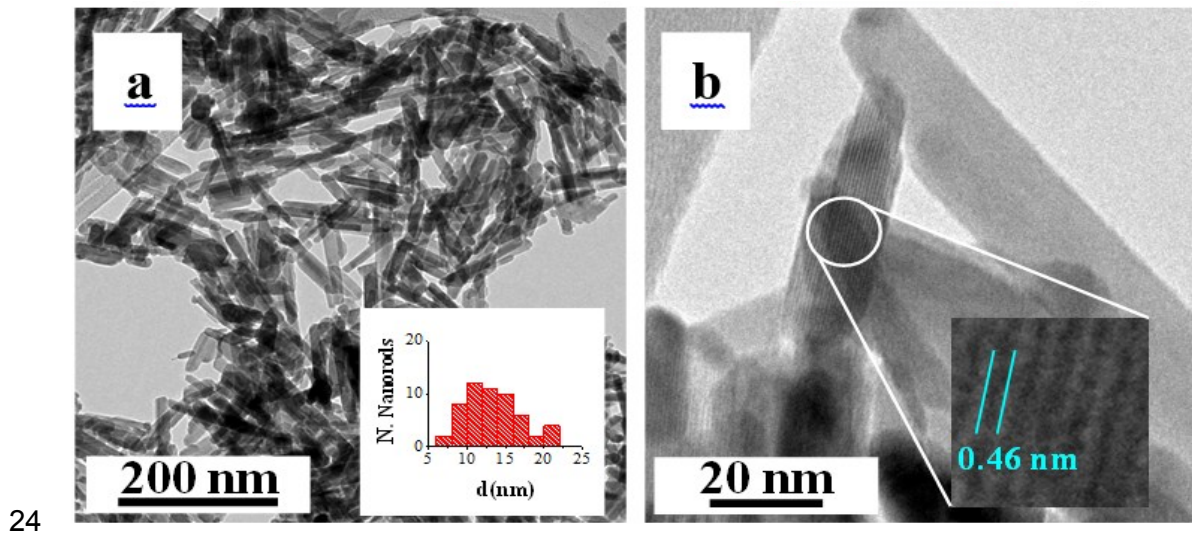

25 **Figure 2.** TEM micrographs of fresh CuO/Cryptomelane: a) Needle-like nanorods  
26 morphology of the cryptomelane support in the CuO/Cryptomelane sample with the  
27 histogram corresponding to the nanorods diameters distribution; b) Magnification of a  
28 cryptomelane nanorod with the periodic lattice fringes of 0.46 nm. TEM images were  
29 obtained in a JOEL (JEM-2010) microscope.

30

31
